# Supplementary material for: Covalent organic framework with sulfonic acid functional groups for visible light-driven CO2 reduction
Source: Royal Society of Chemistry journal article supplement (doi:10.1039/d2ra02660k), 2022-01-01
Supplement: d2ra02660k1.pdf [file d2ra02660k1.pdf]

## Covalent organic framework with sulfonic acid functional groups for visible light-driven CO<sub>2</sub> reduction

Wanrong Li, Qian Wang, Fuzhi Cui\*, Guofang Jiang\*,

*Advanced Catalytic Engineer Research Center of the Ministry of Education, College of Chemistry and Chemical Engineering, Hunan University, Changsha 410082, China.*

### Materials Characterization

The crystal structure of the material was analyzed by X-ray powder diffractometer (XRD, Bruker D8 Advance). Fourier transform infrared spectrometer (FT-IR, TENSOR 27) was used to analyze the composition and structure of photocatalyst. The elemental composition and electronic structure of the materials were analyzed by X-ray photoelectron spectroscopy (XPS, AXIS SUPPA). Surface area of the catalysts used to analyze by N<sub>2</sub> adsorption and desorption isotherms with automatic pore size analyzer Brunauer-Emmett-Teller (BET, JW-BK 200C). The thermal stability of the material was tested by the thermogravimetric-differential thermal synchronization analyzer (TGA, STA 7200). Using automatic pore size analyzer (BET Micromeritics ASAP) to study the amount of adsorption of CO<sub>2</sub>. Field emission scanning electron microscope (SEM, Hitachi) was used to observe the surface morphology of the material. The ordered structure of the materials were observed by high resolution transmission electron microscope (HRTEM, Titan G260-300). Ultraviolet integrating sphere (DRS, UV-2600) were used to test the photoelectric properties of the materials, test the background baseline with BaSO<sub>4</sub> powder, calculation of band gap energy E<sub>g</sub> of semiconductor by Tauc plot method. Electron spin

resonance (ESR, Bruker EMXplus-6/1) was used to measure the key active substances. Use a high-performance fluorescence spectrometer (PL, FP-8500) and time-resolved fluorescence (TRPL, Edinburgh FLS1000) to further illustrate the charge separation role of materials. CHI660e three-stage electrochemical workstation is used to further study the separation efficiency of charge carriers. Under the irradiation of xenon lamp, the photocurrent transient response (PC), electrochemical impedance (EIS) and Mott-Schottky curves (MS) at 500, 1000 and 1500 Hz in the switching period were measured respectively. Platinum sheet was used as counter electrode, Ag/AgCl electrode was used as the reference electrode, and tin dioxide glass (FTO) coated with  $1 \times 1 \text{ cm}^2$  material was used as working electrode, 0.5 M  $\text{Na}_2\text{SO}_4$  aqueous solution was used as the electrolyte.

### **Synthesis of TpPa-SO<sub>3</sub>H and TpPa**

TpPa-SO<sub>3</sub>H and TpPa were synthesized by solvothermal method. Tp (63 mg, 0.3 mmol) and Pa-SO<sub>3</sub>H (84.7 mg, 0.45 mmol) / Pa (48.6 mg, 0.45 mmol) were dissolved in a mixture of solvents of 1,4-dioxane/mesitylene (V:V = 1/4) and ultrasonicated for 15 min. Then, 0.3 ml of 6 M acetic acid aqueous solution was added. The ampoule bottle was flash frozen in liquid nitrogen, The mixture was heated at 120°C for 3 days in an oven. The cooled dark red and red products were collected by centrifugation and washed three times with 1,4-dioxane, water and acetone, respectively. and finally dried at 120°C in a vacuum oven for 8 h.<sup>1,2</sup>

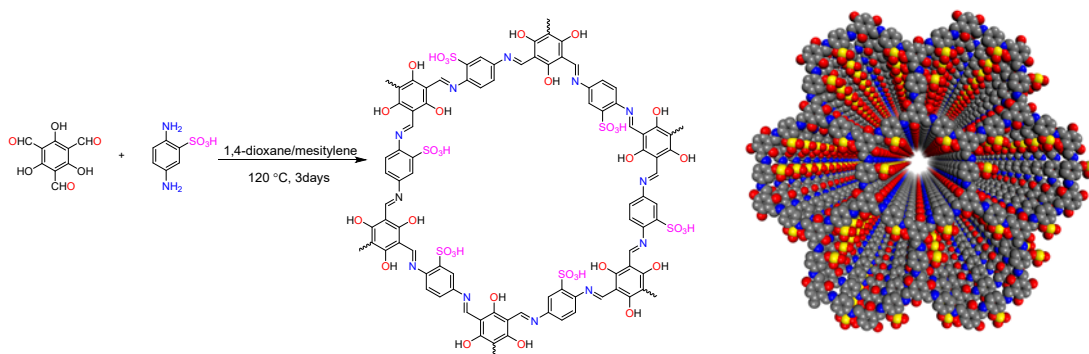

Fig.S1. Synthesis schematic of TpPa-SO<sub>3</sub>H.

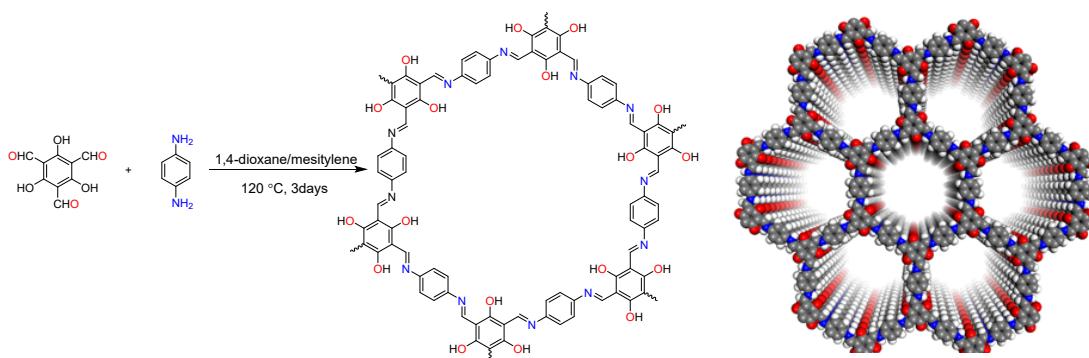

Fig.S2. Synthesis schematic of TpPa.

### Photocatalytic CO<sub>2</sub> reduction experiments

Photocatalytic reduction of CO<sub>2</sub> with Xe lamp as light source. The all-glass automatic online trace gas analysis system (Labsolar 6A) was used to evaluate the photocatalytic performance of the samples. A closed quartz reactor was charged with the photocatalyst (5 mg), acetonitrile (MeCN, 4 mL), triethanolamine (TEOA, 1.5 mL), H<sub>2</sub>O (1 mL) and Ru(bpy)<sub>3</sub>Cl<sub>2</sub>·6H<sub>2</sub>O (10 mg). Before light irradiation, degassing with CO<sub>2</sub> was performed to remove trace gases inside the reactor. The reaction mixture was illuminated for 4 h with a 300 W Xe light source equipped with a  $\lambda > 420$  nm cut-off filter. Every 30 minutes, the content of CO was detected qualitatively and quantitatively by a gas chromatograph (Fuli GC9790II) equipped with FID.

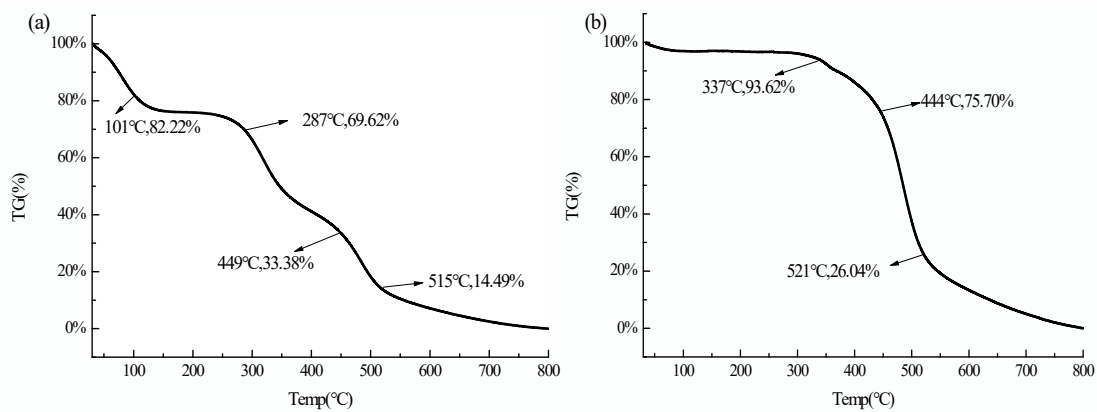

Fig.S3. TG profile of (a) TpPa-SO<sub>3</sub>H and (b) TpPa.

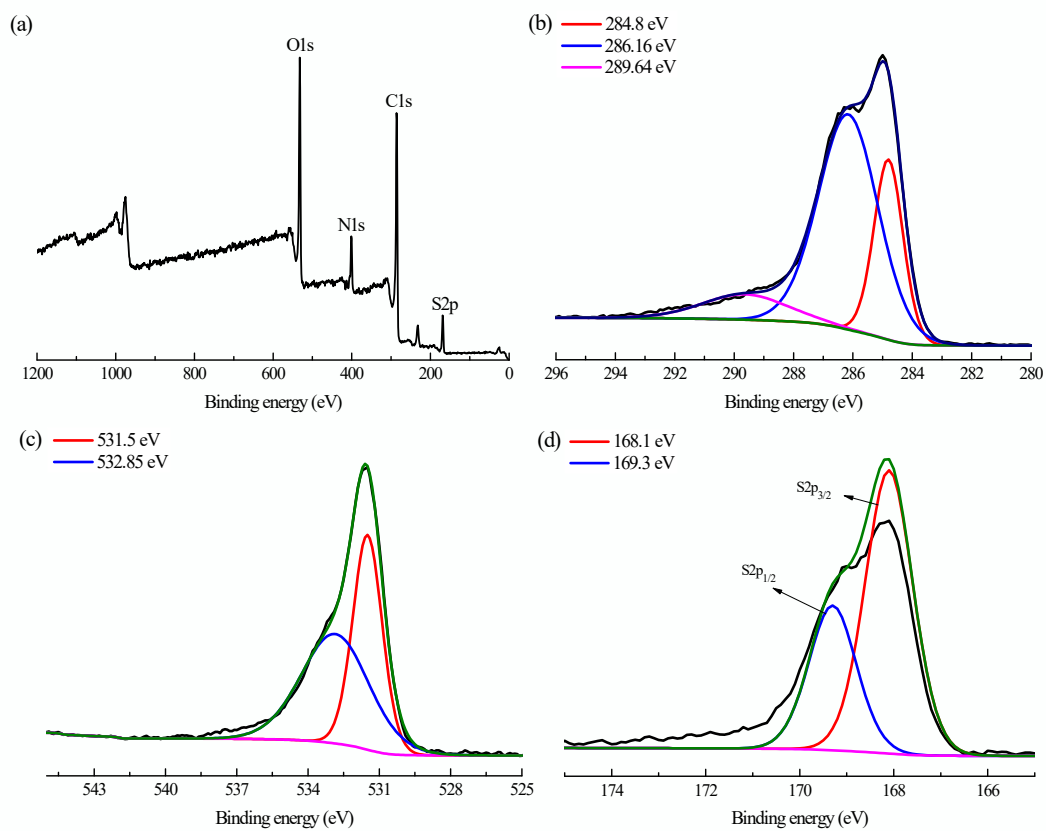

Fig.S4. XPS survey spectra of TpPa-SO<sub>3</sub>H (a) full spectrum (b) C1s (c) O1s (d) S2p.

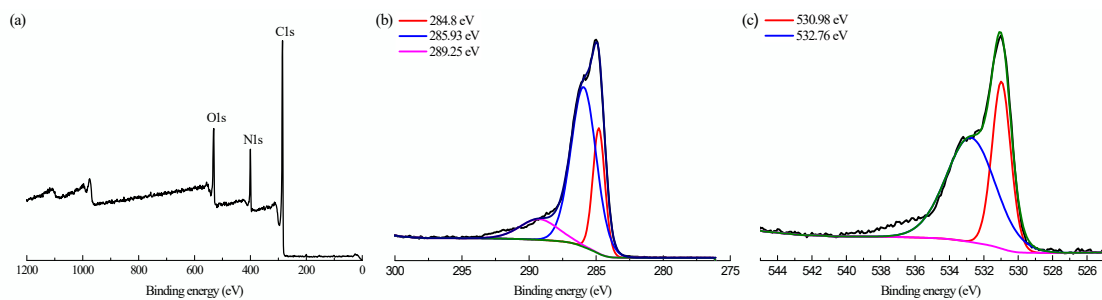

Fig.S5. XPS survey spectra of TpPa (a) full spectrum (b) C1s (c) O1s.

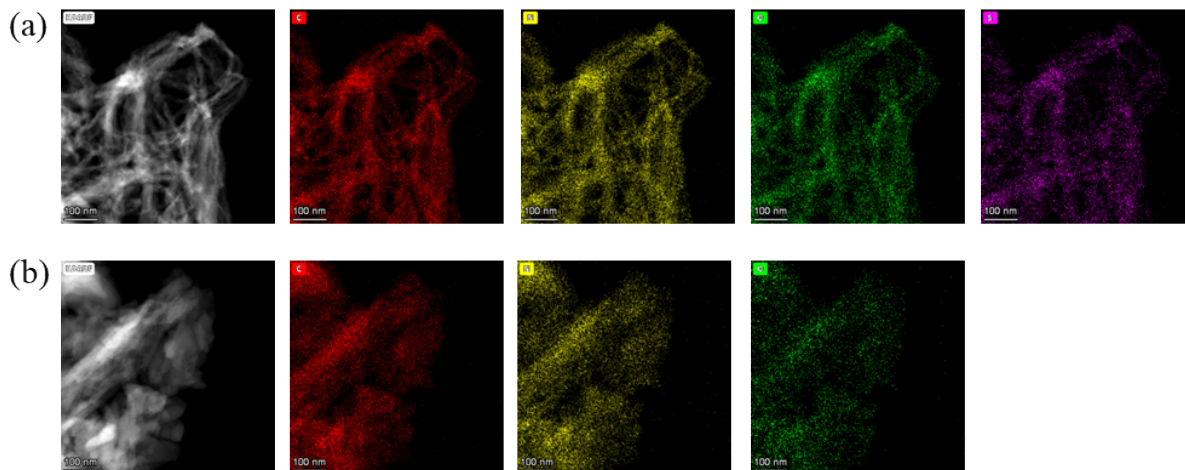

Fig.S6. EDX elemental mapping of (a) TpPa-SO<sub>3</sub>H and (b) TpPa

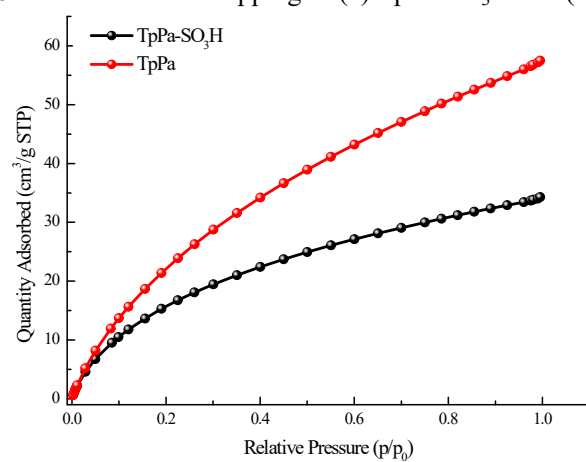

Fig.S7. CO<sub>2</sub> adsorption isotherms of TpPa-SO<sub>3</sub>H and TpPa

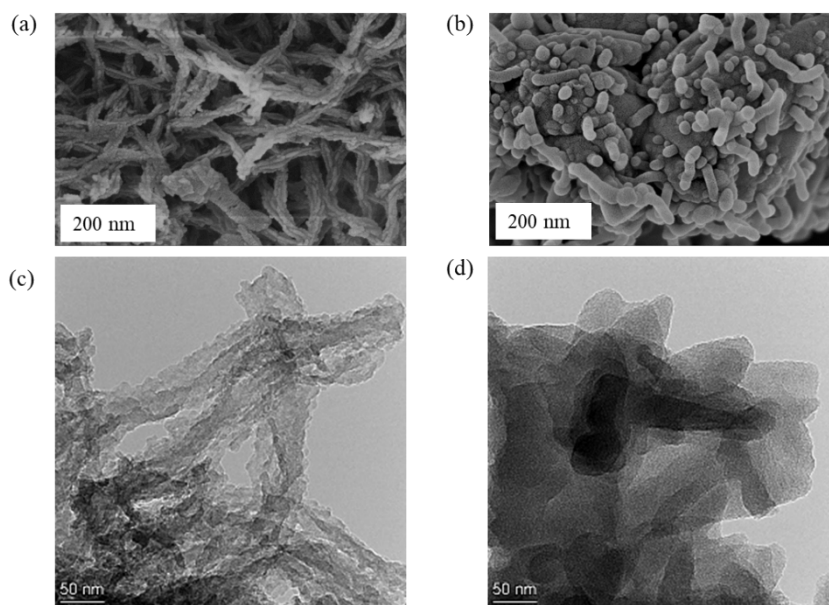

Fig.S8. SEM image of (a) TpPa-SO<sub>3</sub>H and (b) TpPa. HRTEM image of (c) TpPa-SO<sub>3</sub>H and (d)

TpPa.

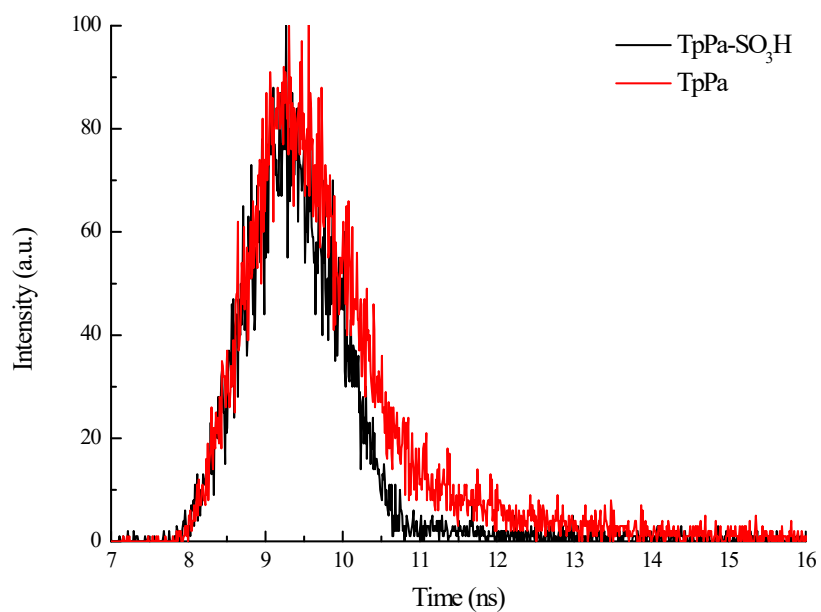

Fig.S9. TRPL spectra of TpPa-SO<sub>3</sub>H and TpPa.

Table S1. PL decay parameters ( $\lambda_{ex} = 370 \text{ nm}$ ,  $\lambda_{em} = 610 \text{ nm}$ ).

| Sample                 | $\tau(\text{ns})$ | $\chi^2$ |
|------------------------|-------------------|----------|
| TpPa-SO <sub>3</sub> H | 0.5               | 1.105    |
| TpPa                   | 0.8               | 1.017    |

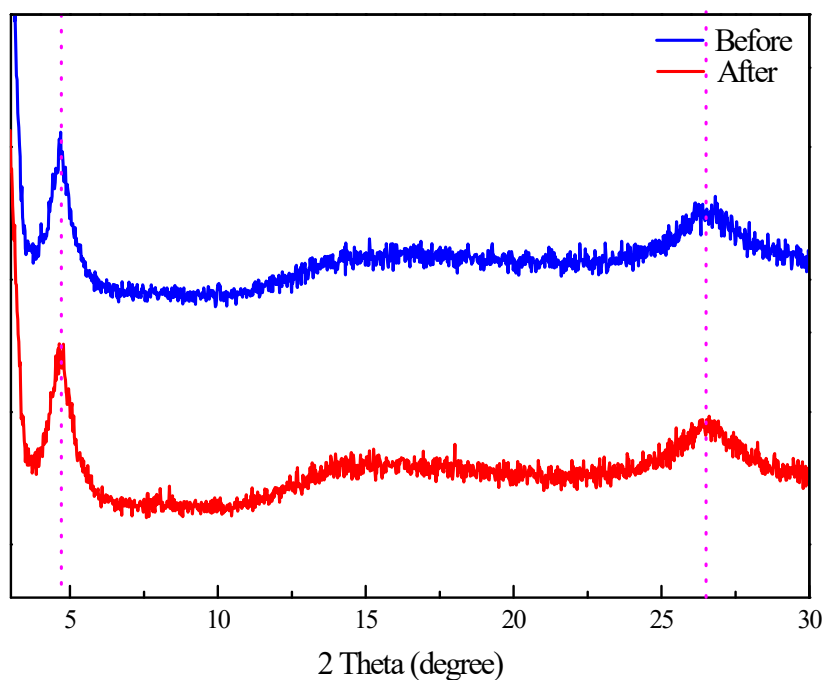

Fig.S10. XRD comparison chart before and after TpPa-SO<sub>3</sub>H catalysis.

Table S2. Comparison of performance of various photocatalysts for reducing CO<sub>2</sub>

| Photocatalyst                                                      | Reaction time | Yield                       | Reference |
|--------------------------------------------------------------------|---------------|-----------------------------|-----------|
| TpPa-SO <sub>3</sub> H                                             | 4h            | 416.61 μmol·g <sup>-1</sup> | This Work |
| TpPa                                                               | 4h            | 380.68 μmol·g <sup>-1</sup> | This Work |
| CdSe/ZIF-8                                                         | 12h           | 42.317 μmol·g <sup>-1</sup> | [3]       |
| g-C <sub>3</sub> N <sub>4</sub> -RGO-MOF                           | 4h            | 383.79 μmol·g <sup>-1</sup> | [4]       |
| Bi <sub>2</sub> S <sub>3</sub> QDs/g-C <sub>3</sub> N <sub>4</sub> | 8h            | 54.74 μmol·g <sup>-1</sup>  | [5]       |
| PMA@NH <sub>2</sub> -MIL-68(Rh)                                    | 10h           | 387.28 μmol·g <sup>-1</sup> | [6]       |
| Sm-TiO <sub>2</sub> nanoparticles                                  | 20h           | 55.47 μmol·g <sup>-1</sup>  | [7]       |

### Notes and references

- 1 K. Jeong, S. Park, G. Y. Jung, S. H. Kim, Y. H. Lee, S. K. Kwak and S.Y. Lee, *Journal of the American Chemical Society*, 2019, **141**, 5880-5885.
- 2 H. Yang, H. Wu, Z. Xu, B. Mu, Z. Lin, X. Cheng, G. Liu, F. Pan, X. Cao and Z. Jiang, *Journal of Membrane Science*, 2018, **561**, 79-88.
- 3 H. J. Peng, P. Q. Zheng, H. Y. Chao, L. Jiang and Z. P. Qiao, *RSC Advances*, 2019, **10**, 551-555.
- 4 R. R. Ikreedeeagh and M. Tahir, *Journal of Environmental Chemical Engineering*, 2021, **9**, 105600
- 5 R. T. Guo, X. Y. Liu, H. Qin, Z. Y. Wang and J. W. Gu, *Applied Surface Science*, 2019, **500**, 144059.
- 6 Y. Shan, D. Liu, C. Xu, P. Zhan, H. Wang, J. Wang, R. He and W. Wang, *New Journal of Chemistry*, 2021, **45**, 7344-7352.
- 7 H. Peng, R. Guo and H. Lin, *Journal of Rare Earths*, 2020, **38**, 1297-1304.
